# Supplementary material for: Continuous floc image analyser (C-FIA) for tracking floc particle dynamics during coagulation–flocculation–settling processes
Source: Royal Society of Chemistry journal article supplement (doi:10.1039/d2ew00389a), 2023-01-01
Supplement: d2ew00389a2.pdf [file d2ew00389a2.pdf]

## Supplementary Information

### Continuous Floc Image Analyser (C-FIA) For Tracking Floc particles Dynamics During Coagulation-Flocculation-Settling Processes

Hiua Daraei,<sup>a,g</sup> Bayram Akyol,<sup>a,e</sup> Mahmoud Khedher,<sup>a,f</sup> Edoardo Bertone,<sup>b</sup> John Awad,<sup>a,d</sup> Rodney A. Stewart,<sup>b</sup> Christopher W.K. Chow,<sup>a</sup> Jinming Duan<sup>a,c</sup> and John van Leeuwen,<sup>\*a,c</sup>

<sup>a</sup>Sustainable Infrastructure and Resource Management (SIRM), UniSA STEM, University of South Australia, Mawson Lakes, SA, Australia

<sup>b</sup>Griffith University, Gold Coast, QLD, Australia

<sup>c</sup>Future Industries Institute, Mawson Lakes, SA, Australia

<sup>d</sup>CSIRO Land and Water, Waite Campus, Urbane, SA, Australia

<sup>e</sup> International Agricultural Research and Training Centre, İzmir, Turkey

<sup>f</sup>Department of Public Works Engineering, Faculty of Engineering, Mansoura University, Mansoura, Egypt

<sup>g</sup>Environmental Health Research Centre, Kurdistan University of Medical Sciences, Sanandaj, Kurdistan, Iran

\*Corresponding author: [John.vanleeuwen@unisa.edu.au](mailto:John.vanleeuwen@unisa.edu.au)

- Number of pages (including this cover sheet): 9
- Number of figures: 2 (Fig. S1 and Fig. S2)
- Number of tables: 1 (Table S1)
- Number of appendices: 1 (Appendix 1)

**a1) Myponga River sample treated with  $51 \text{ mg L}^{-1}$  alum**

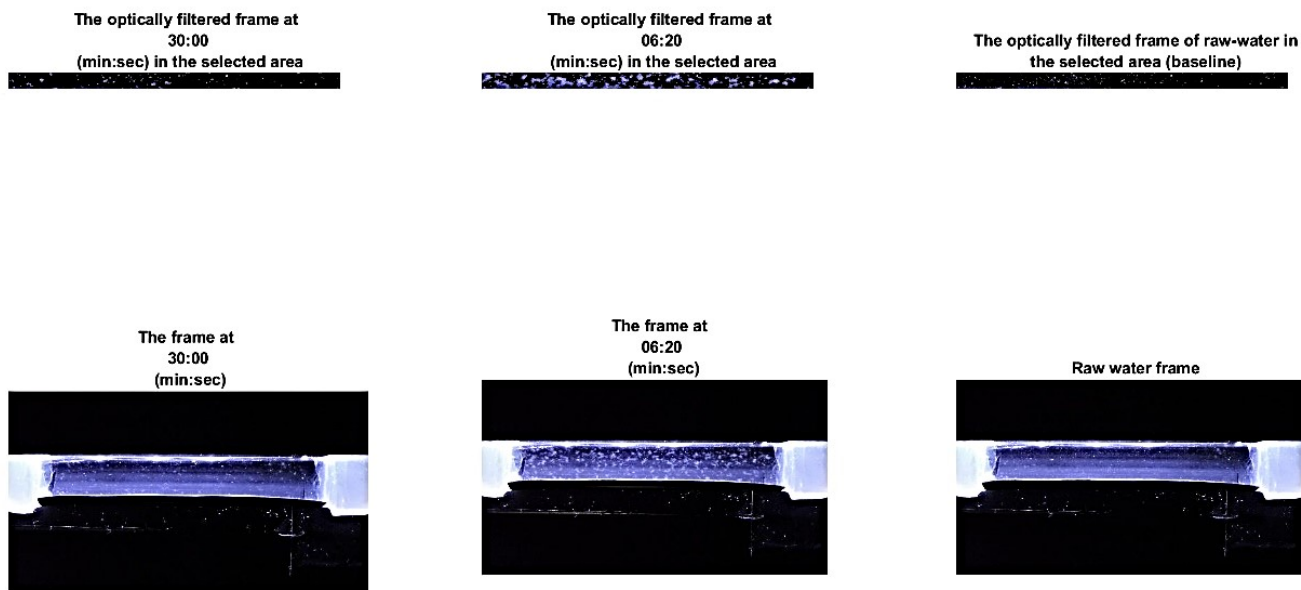

**Fig. S1** Video frames and their corresponding optically filtered selected pixels-area for (a) C-FIA data extraction in raw water, (b) flocculation and (c) end of settling stages of Middle River sample ( $202 \text{ mg L}^{-1}$  alum dose); \*The corresponding extracted C-FIA FI data are presented in Fig. 5; \*\*The corresponding video recordings are presented as Supplementary Information.

**a2) Myponga River sample treated with  $101 \text{ mg L}^{-1}$  alum**

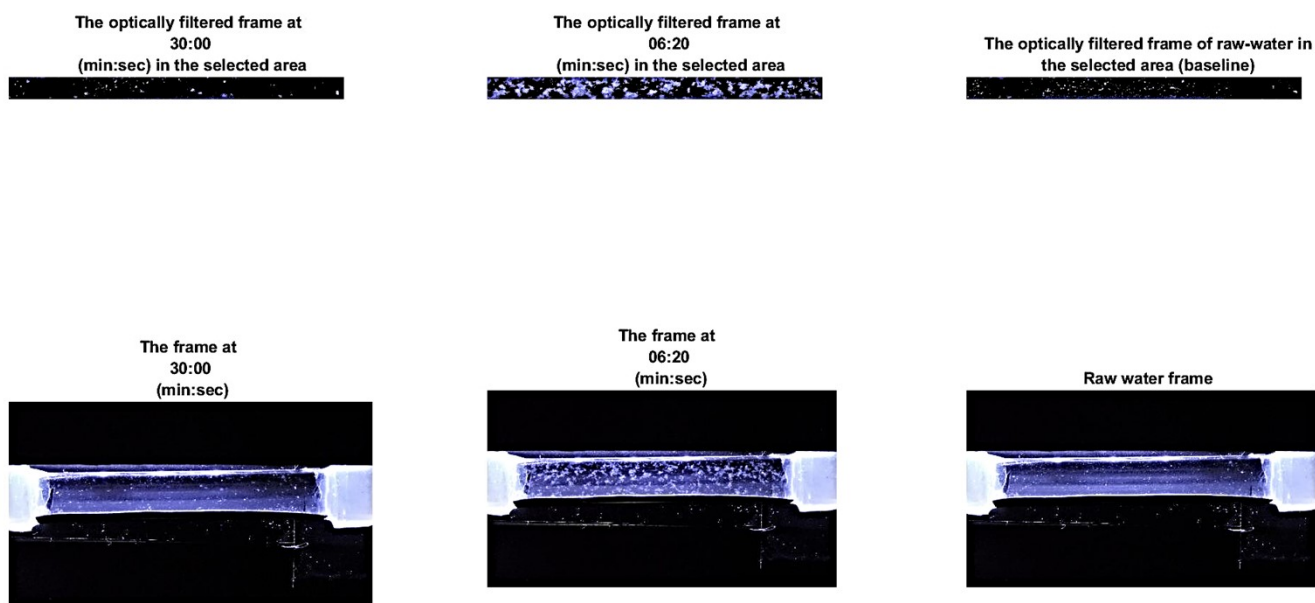

**Fig. S1 (continue)**

a3) Myponga River sample treated with  $202 \text{ mg L}^{-1}$  alum

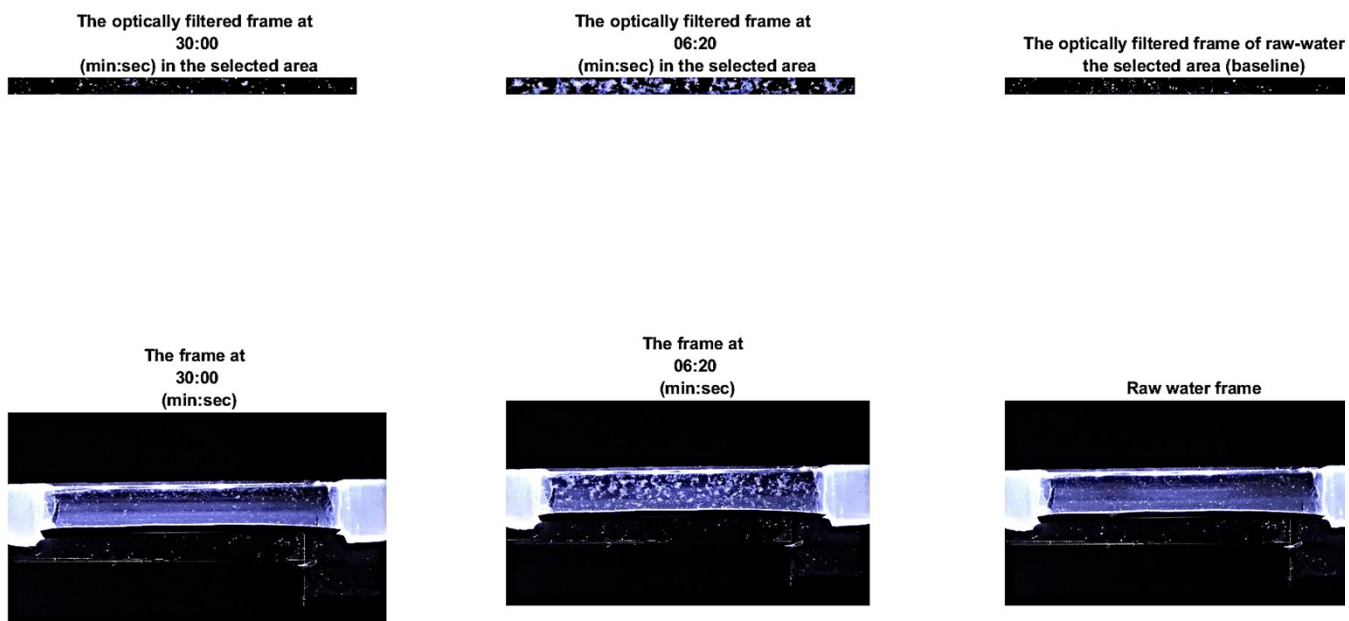

Fig. S1 (continue)

a4) Myponga River sample treated with  $303 \text{ mg L}^{-1}$  alum

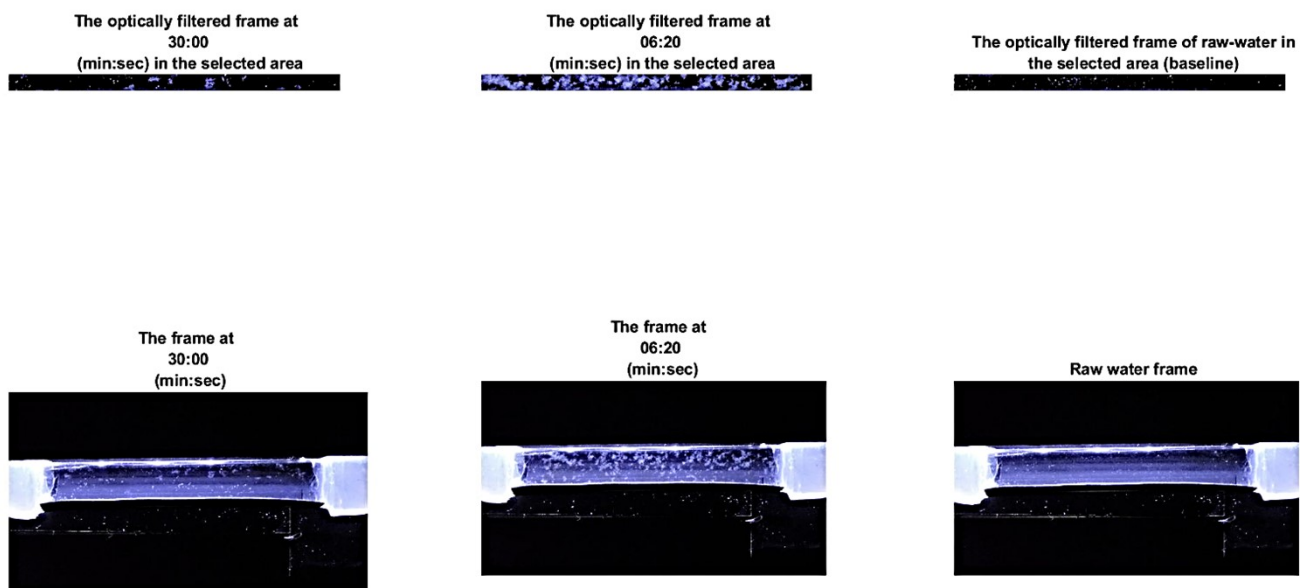

Fig. S1 (continue)

b1) Murray River sample treated with  $26 \text{ mg L}^{-1}$  alum

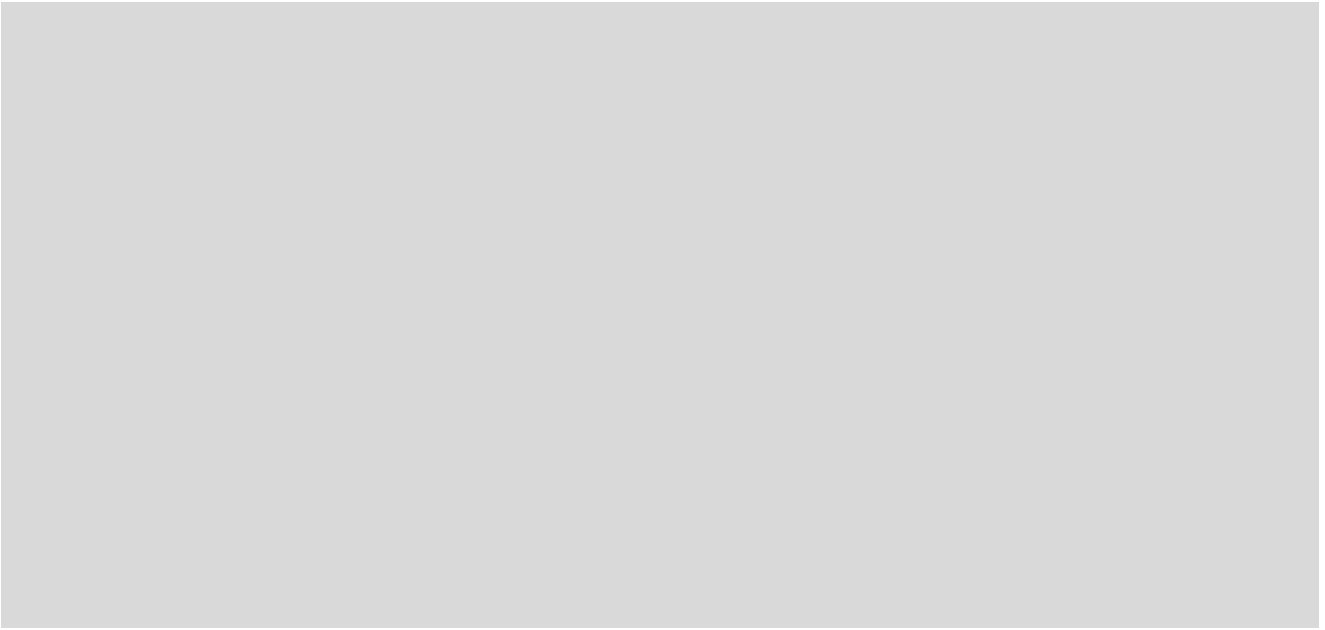

**Fig. S1** (continue)

b2) Murray River sample treated with  $52 \text{ mg L}^{-1}$  alum

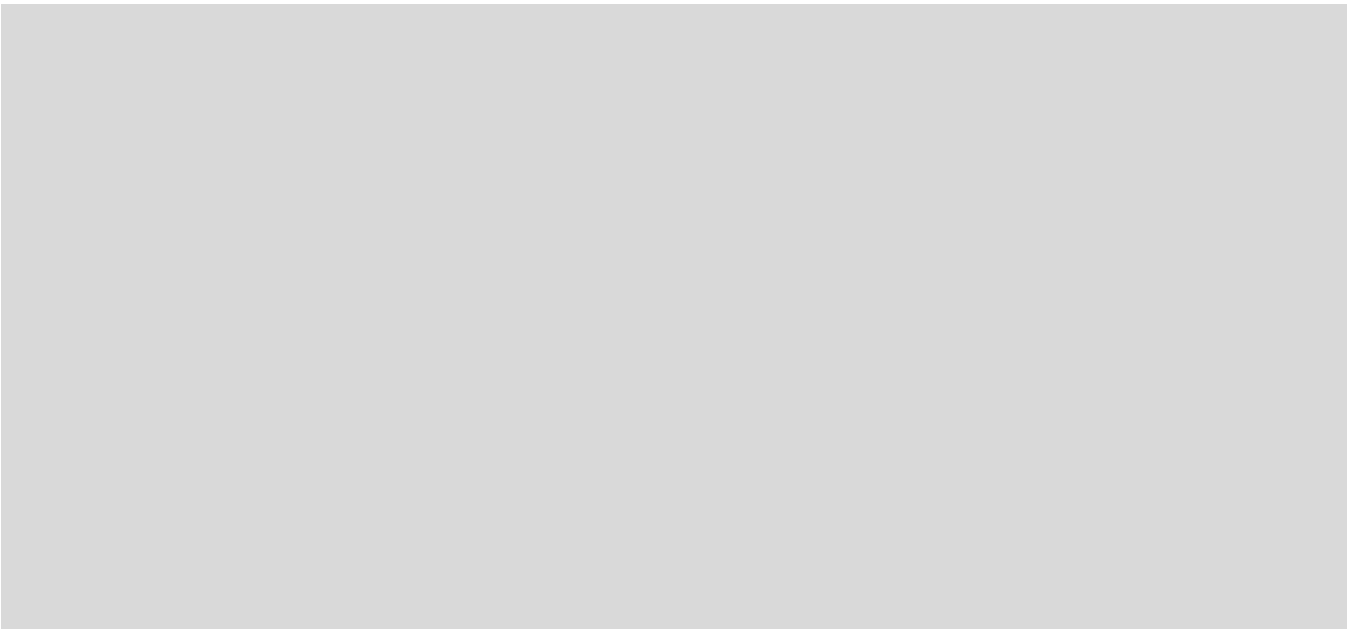

**Fig. S1** (continue)

b3) Murray River sample treated with  $104 \text{ mg L}^{-1}$  alum

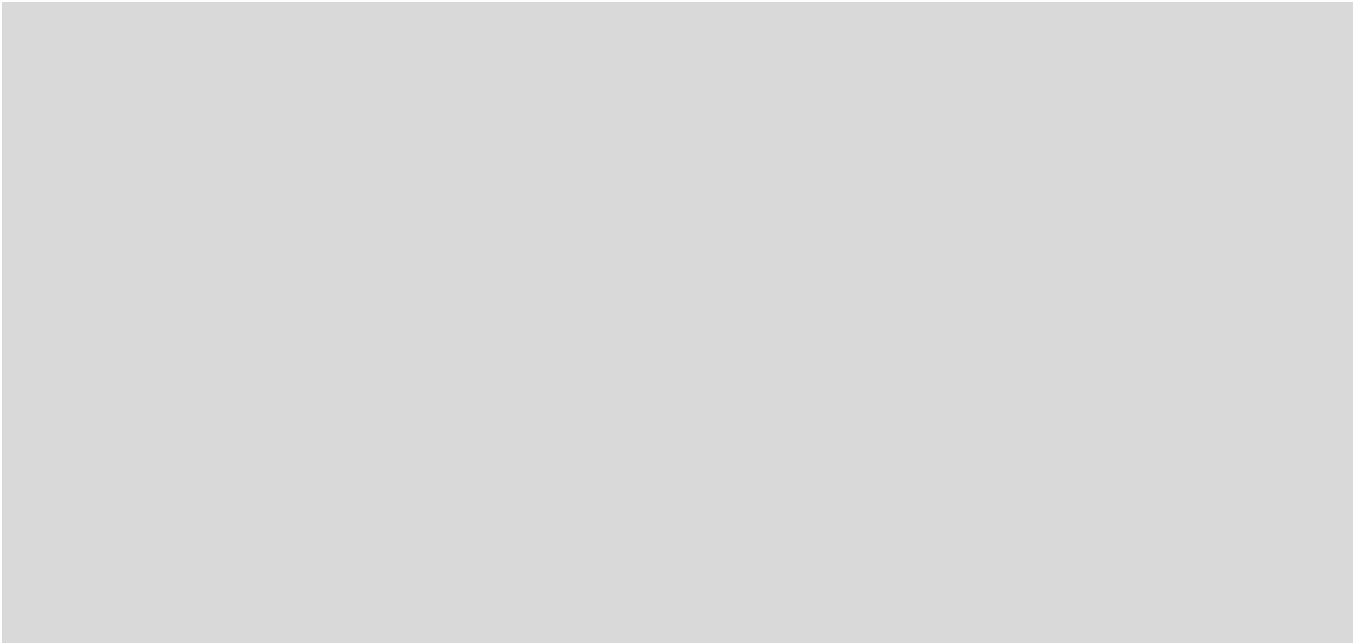

**Fig. S1** (continue)

b4) Murray River sample treated with  $156 \text{ mg L}^{-1}$  alum

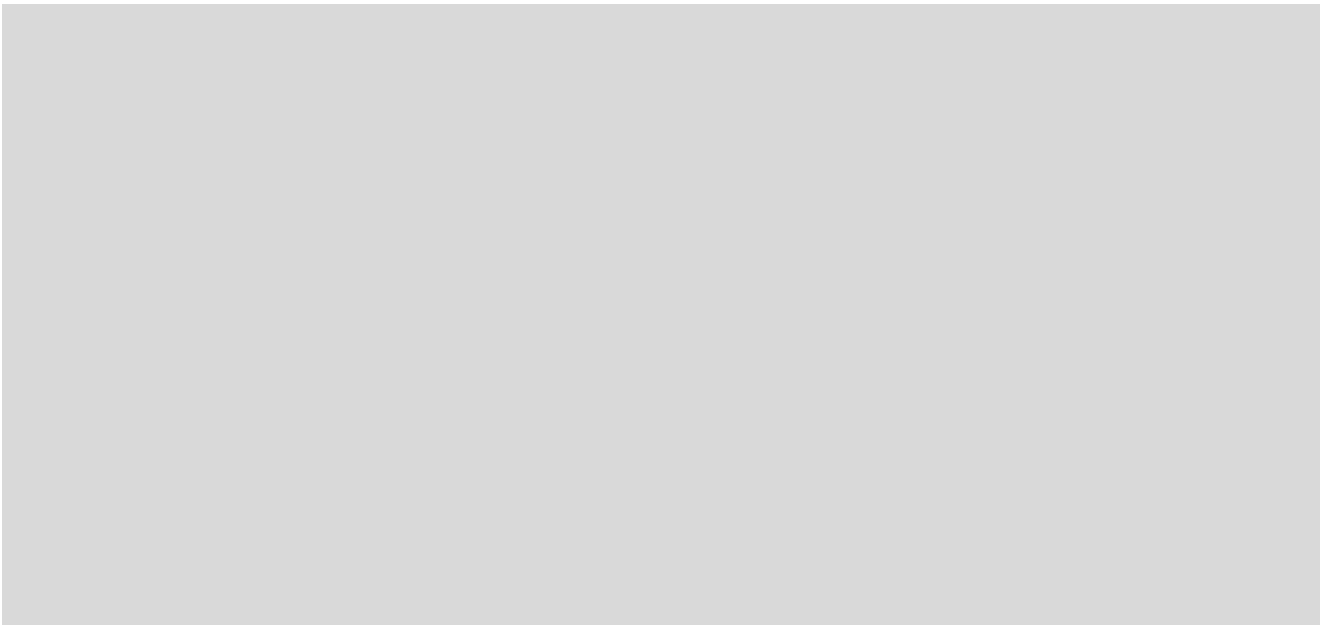

**Fig. S1** (continue)

c1) Middle River sample treated with  $51 \text{ mg L}^{-1}$  alum

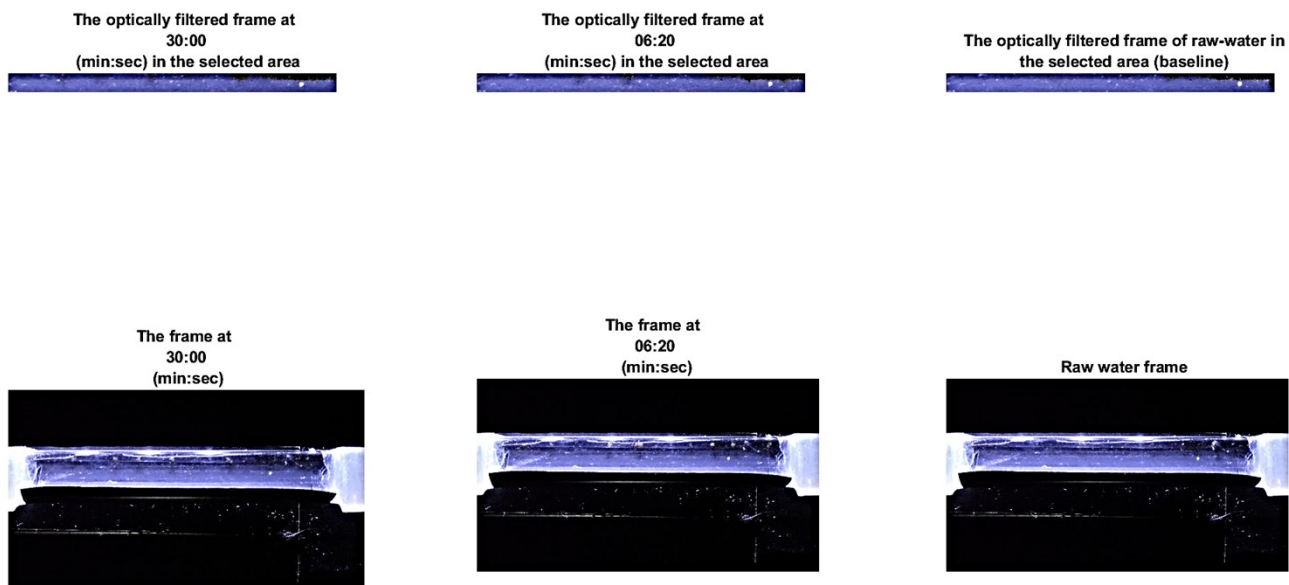

Fig. S1 (continue)

c2) Middle River sample treated with  $202 \text{ mg L}^{-1}$  alum

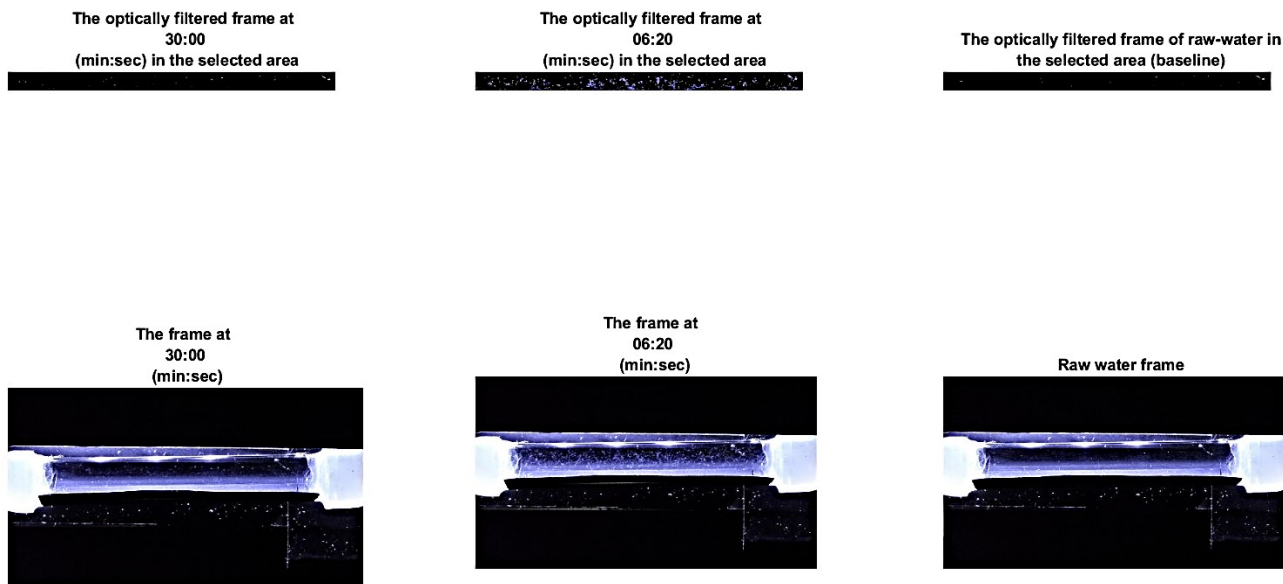

Fig. S1 (continue)

c3) Middle River sample treated with  $303 \text{ mg L}^{-1}$  alum

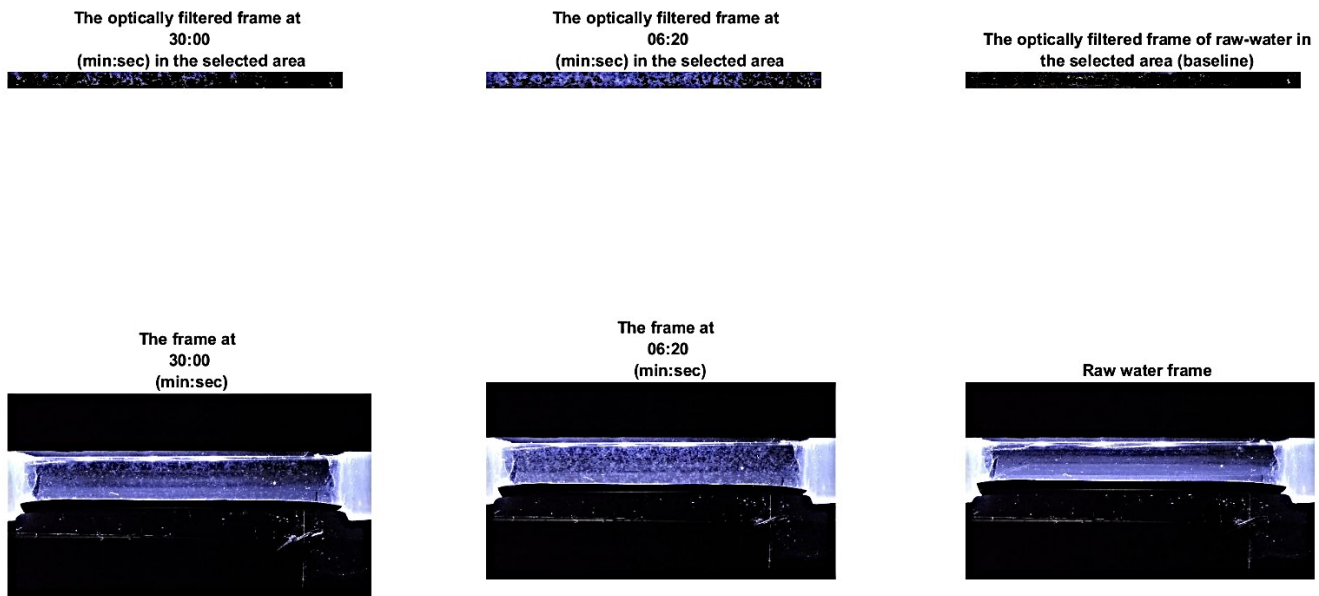

Fig. S1 (end)

c1) The C-FIA selected video frame for particle analysis

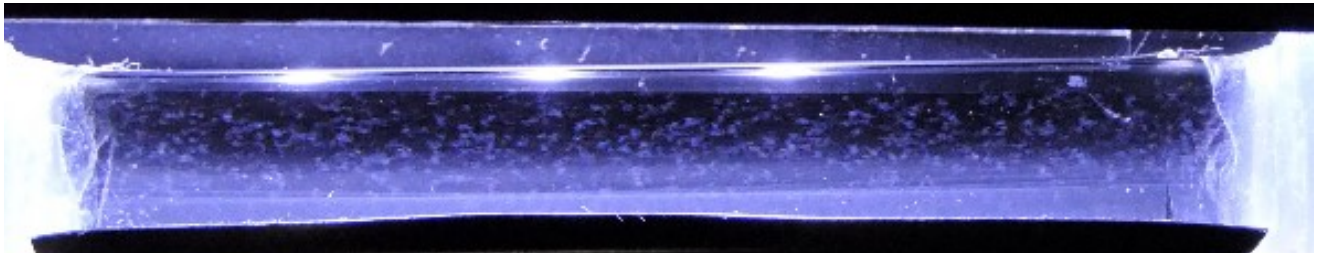

c2) Cropped C-FIA selected video frame with extraneous light removed

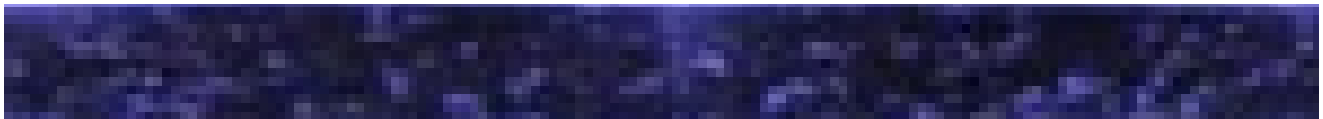

c3) The optical filtration view of the selected area before analysis

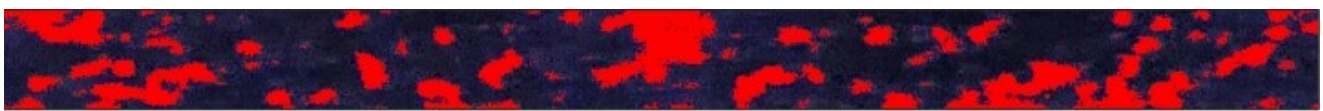

c4) Summary of results for image analysis of particles.

 Summary.csv

| File        | Edit | Font  |            |              |        |        |
|-------------|------|-------|------------|--------------|--------|--------|
| Slice       |      | Count | Total Area | Average Size | %Area  | Mean   |
| 1000660.jpg |      | 219   | 13.943     | 0.064        | 24.118 | 70.495 |

**Fig. S2** The floc particles size/number/density data attained by image analysis of a C-FIA selected video frame (at 10' 00" process time) of Middle River (c) sample using ImageJ software. \*The average size of the floc particles (in mm, and mm<sup>2</sup> for total area) was determined using the C-FIA photography cell length (60 mm length of the photographic area of the a1 and b1 photos) using the available function in ImageJ software. \*\*The average RGB signal intensity for each distinguished particle termed as "Mean" in the summary results table of ImageJ is based on an arbitrary unit (a.u.) which can be an index for density or breakability of the formed flocs when other influencing factors like light intensity and radiation angle to the C-FIA cell is well fixed



**Table S1** The results of the floc particles analyses using ImageJ software for all experiments

| Sample        | Alum dose | Count | Total area | Average size | %Area | Mean |
|---------------|-----------|-------|------------|--------------|-------|------|
| Myponga River | 51        | 96    | 6.8        | 0.071        | 23.5  | 97   |
|               | 101       | 759   | 50.4       | 0.067        | 24.6  | 130  |
|               | 202       | 1040  | 124.6      | 0.120        | 29.5  | 126  |
|               | 303       | 452   | 32.7       | 0.072        | 15.6  | 167  |
| Murray River  | 52        | 394   | 44.5       | 0.113        | 22.2  | 85   |
|               | 104       | 537   | 52.2       | 0.097        | 18.8  | 103  |
| Middle River  | 51        | 326   | 4.2        | 0.013        | 3.8   | 162  |
|               | 202       | 219   | 13.9       | 0.064        | 24.1  | 71   |
|               | 303       | 1252  | 55.6       | 0.044        | 41.0  | 117  |

## Appendix 1

Reynolds number calculation for the flow path through the tubes (tubing with 3 mm internal diameter and photography cell with 3 mm × 9 mm cross section size) in these experiments:<sup>1</sup>

### 1- Reynolds number for tubing with 3 mm internal diameter

$$Q = \sim 25 \text{ mL min}^{-1}$$

$$\mu = \sim 0.6 \text{ g cm}^{-1} \text{ min}^{-1}$$

$$\rho = \sim 1 \text{ g mL}^{-1}$$

$$d = 3 \text{ mm (0.3 cm)}$$

$$A = \pi/4 * d^2 = \pi/4 * 0.3^2 = 0.0707 \text{ cm}^2$$

$$u = Q/A = 25/0.0707 = \sim 353.7 \text{ cm/min}$$

$$Re = \rho * u * d / \mu = 1 * 353.7 * 0.3 / 0.6 = \sim 177$$

### 2- Reynolds number for photography cell with 3 mm × 9 mm cross section size

$$Q = \sim 25 \text{ mL min}^{-1}$$

$$\mu = \sim 0.6 \text{ g cm}^{-1} \text{ min}^{-1}$$

$$\rho = \sim 1 \text{ g mL}^{-1}$$

$$\text{width}(w) * \text{depth}(d) = 0.9 \text{ cm} * 0.3 \text{ cm}$$

$$P = 2 * (w + d) = 2.4 \text{ cm}$$

$$A = w * d = 0.27 \text{ cm}^2$$

$$d' = 4 * A / P = 0.45$$

$$u = Q/A = 25/0.27 = \sim 92.6 \text{ cm/min}$$

$$Re = \rho * u * d' / \mu = 1 * 92.6 * 0.45 / 0.6 = \sim 70$$

**Re < 2300 can be considered as laminar flow.<sup>1</sup>**

## Reference

1. S. Klutz, S. K. Kurt, M. Lobedann and N. Kockmann, Narrow residence time distribution in tubular reactor concept for Reynolds number range of 10–100, Chemical Engineering Research and Design, 2015, **95**, 22-33.
